# Supplementary material
Source: Springer Nature journal article supplement (https://www.springermedizin.de/resource/supplementary/12913_2013_2804_MOESM2_ESM.pdf/9531406)
Supplement: MOESM2 [file 9531406]

### Personal information and contact information

- Personal information that ensures correct identity and contact information, inclusive of phone numbers to relatives
- Patient data: Social security number, place of residence
- Information on the referring doctor, and contact information: phone number, where to reach him/her.
- If the referring doctor is not the patient's GP/family doctor, who is?

### Important introductory information (check-off points)

- Is there an imminent danger for the need of compulsory care?  Yes  No
- Is the patient suicidal?  Yes  No
- Is the patient a threat to others?  Yes  No
- Is there an emergency situation?  Yes  No
- Is the patient responsible for the care of children?  Yes  No
- Do you suspect severe illness/psychosis?  Yes  No
- Does the patient have a drug problem or addiction?  Yes  No

### Case history and social situation

- Case history. Focus on changes, e.g., worsening
- Development of psychiatric symptoms over time
- Duration of condition/chronic state
- Concrete information on any episodes of violence
- Concrete information on former suicidal risk
- Psychosocial situation (economics, employment, residence, social network, activities)

### Present state and results

- A. Function, symptoms and limitations
  - Present problem, present mental status
  - Level of function: present level, loss and duration of the loss
  - Present state of symptoms and duration of the symptoms
- B. Somatic health
  - Somatic health and diseases
  - Other important conditions – comorbidity
- C. Test results
  - When symptoms of depression: MADRS (Montgomery–Åsberg Depression Rating Scale)
- D. Medications
  - Updated medication record
  - Side effects experienced from medications

### Past and on-going treatment efforts, involved professional network

- A. Tested interventions with assessment of the effect
  - What has the referring doctor tried so far?
- B. Existing interventions/involved services with assessment of the effect
  - Other supportive services that the patient or the family uses
- C. Existing plans

### The patient's assessment

- The patient's experience of the situation/problems
- The patient's desire for and motivation for treatment
- The patient's thoughts or attitude towards the treatment intervention
- Has the patient induced self-treatment or complimentary medicine?

### Reason for the referral

- «Order»/goal for the referral, what the referring doctor is asking of the specialist health care provider
- Reason for referral at this time
